# Supplementary material for: Direct interrogation of the role of H3K9 in metazoan heterochromatin function
Source: PubMed Central journal article supplement — Genes Dev. 2016 Aug 15;30(16):1866–80. doi: 10.1101/gad.286278.116 (PMC5024684; doi:10.1101/gad.286278.116), 2016-08-15

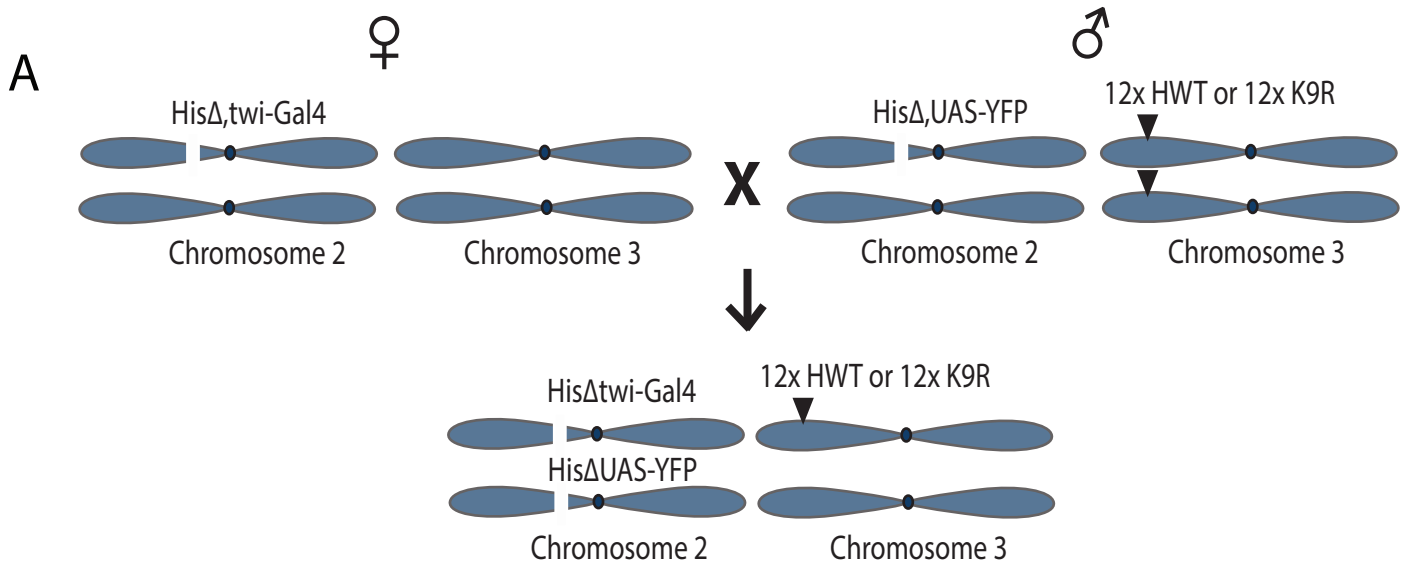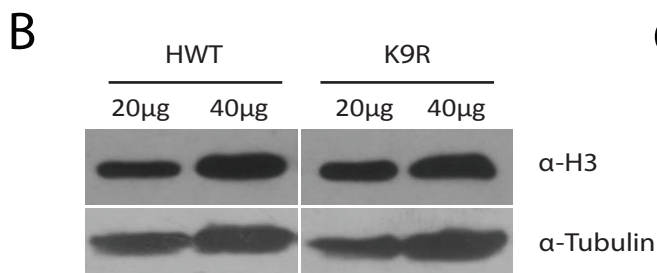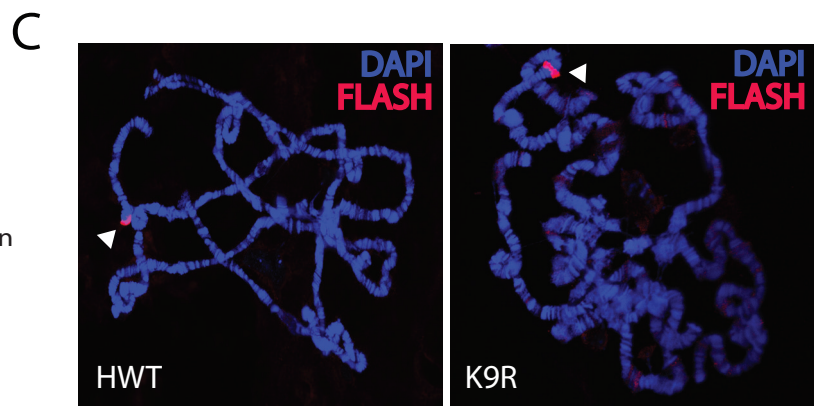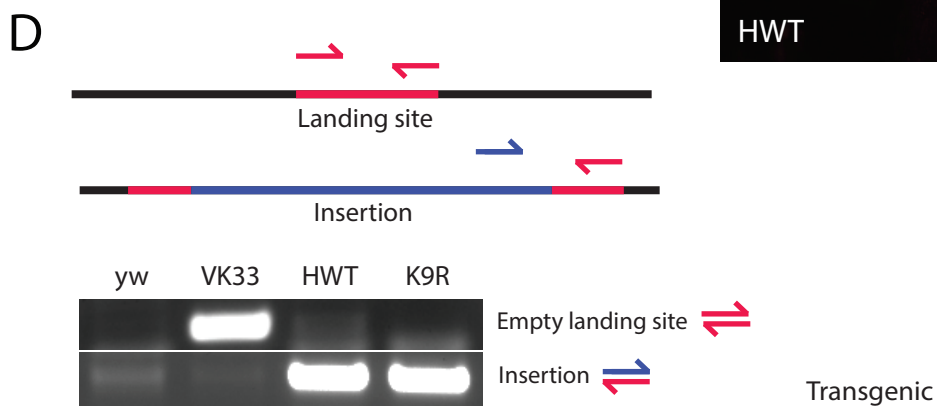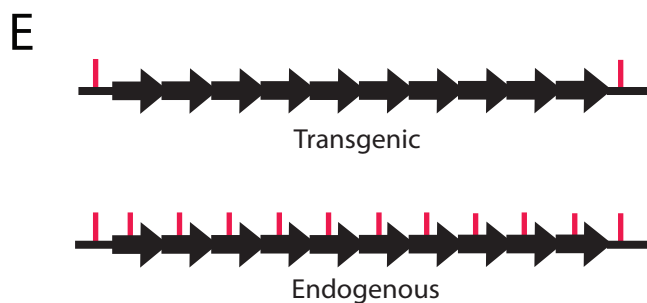

5kb histone cluster

XhoI restriction site

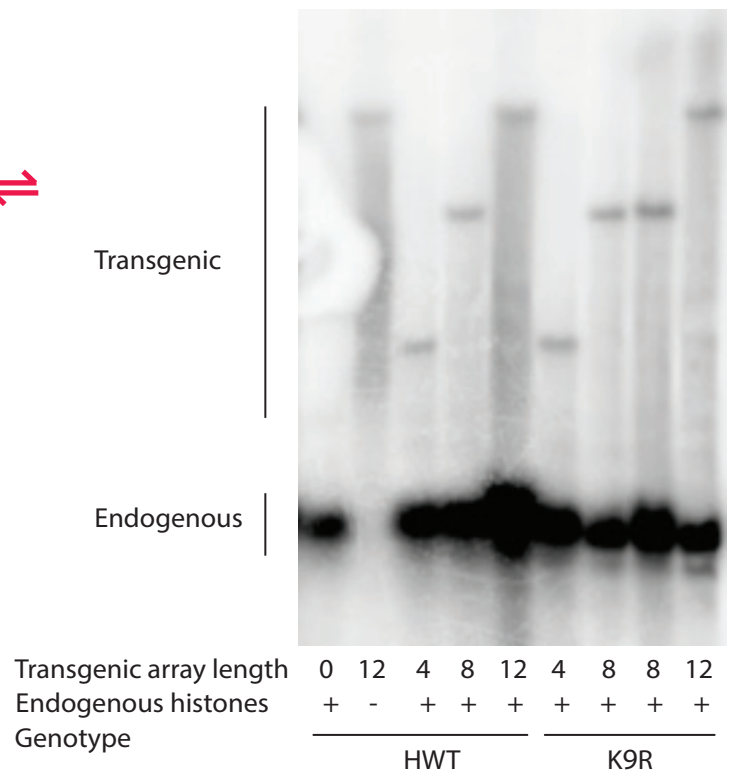

**A**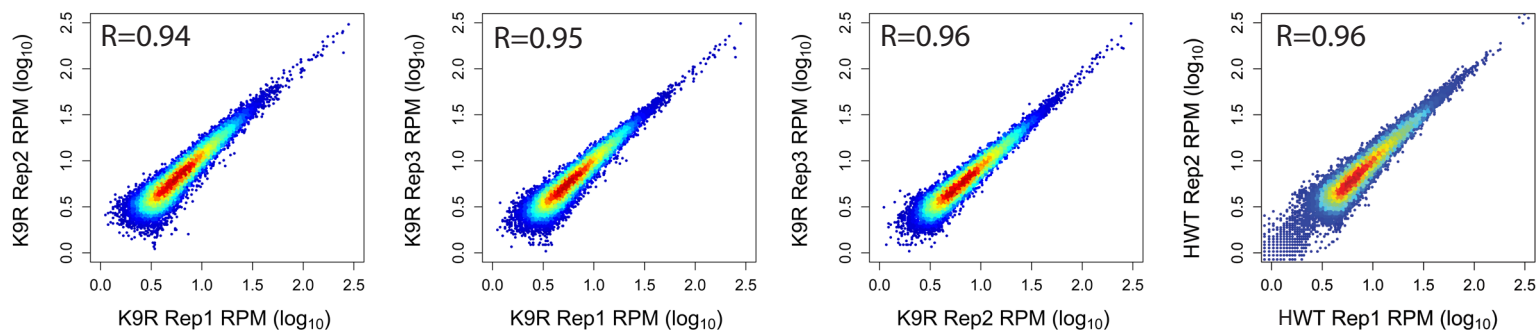**B**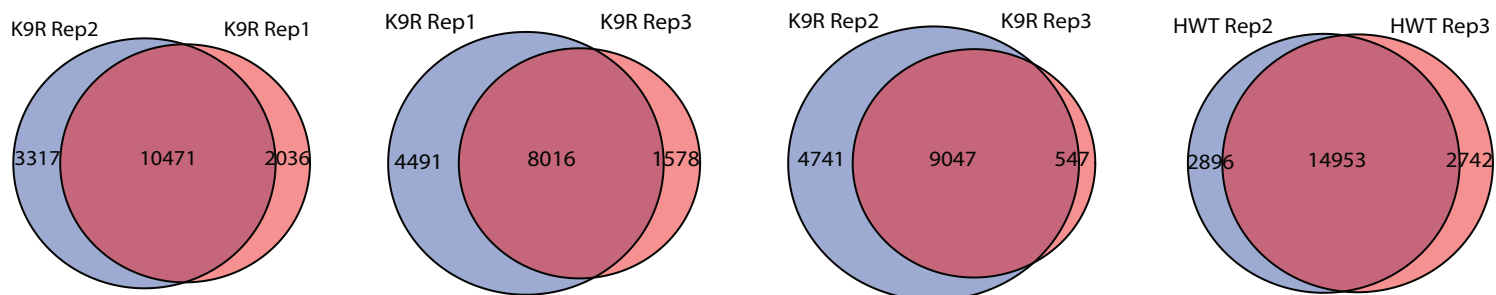**C**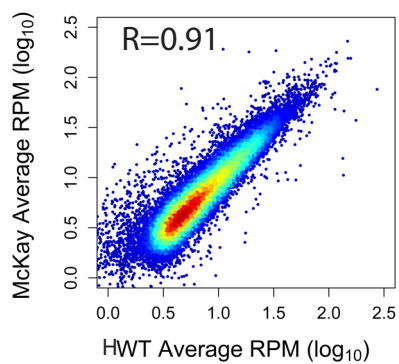**D**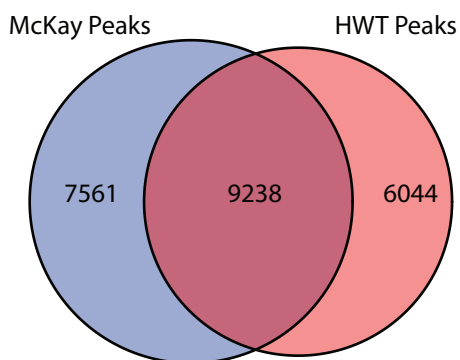**E**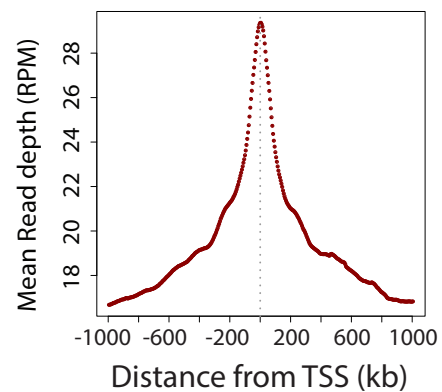**F**

| Replicate | Unique(%) | Multiple (%) |
|-----------|-----------|--------------|
| HWT 1     | 80.0      | 20.0         |
| HWT 2     | 80.0      | 20.0         |
| K9R 1     | 68.0      | 32.0         |
| K9R 2     | 69.8      | 30.2         |
| K9R 3     | 71.0      | 28.9         |

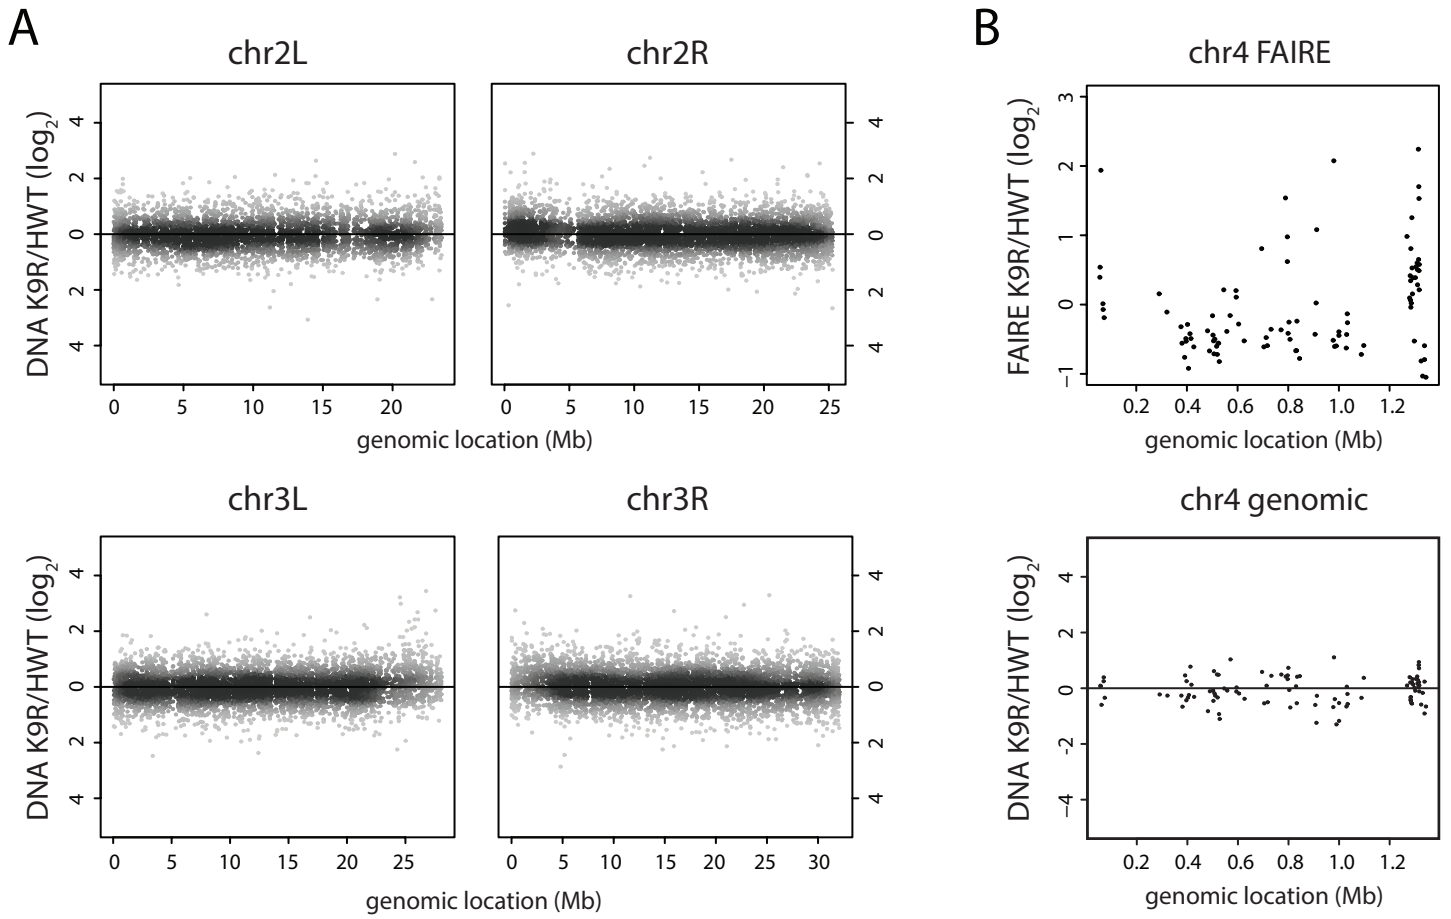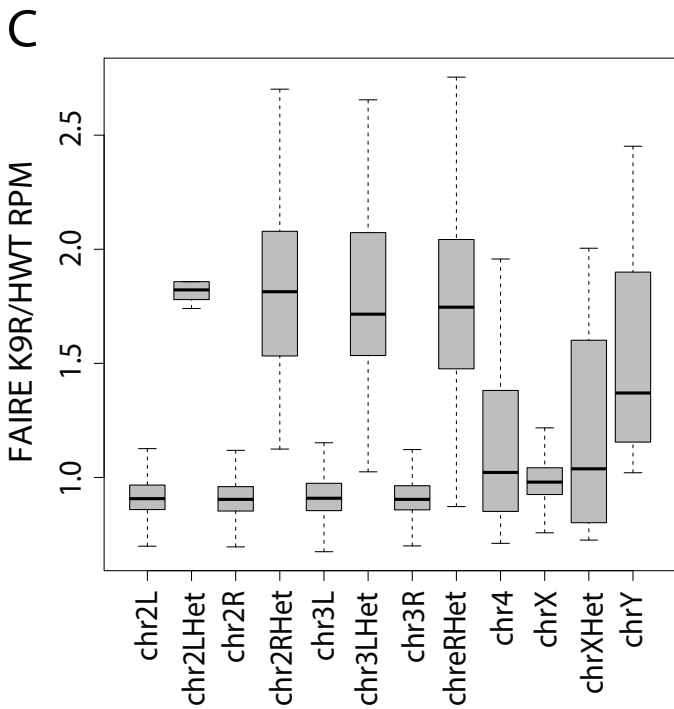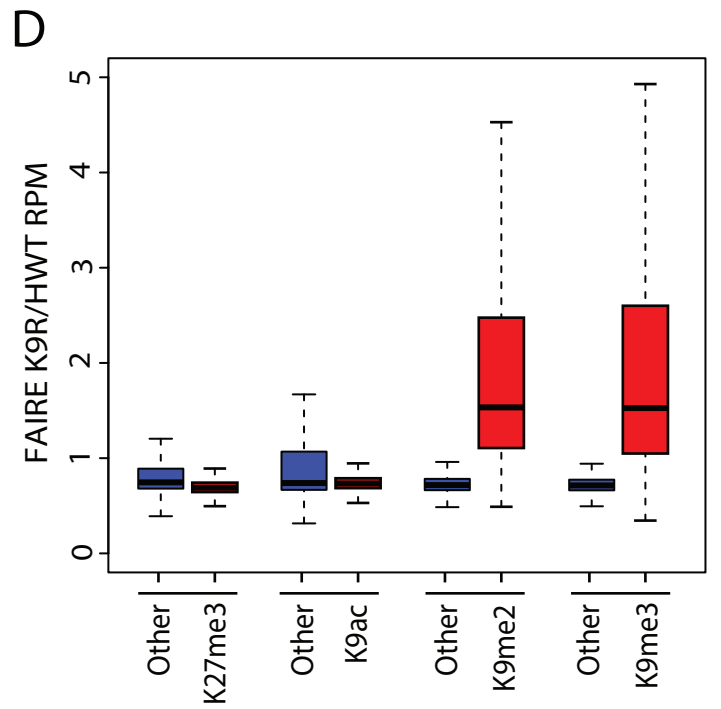

**A**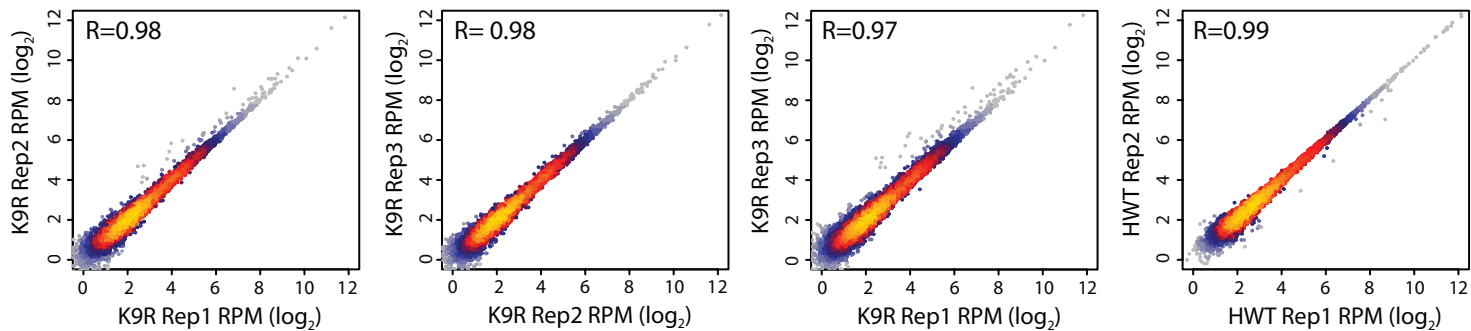**B**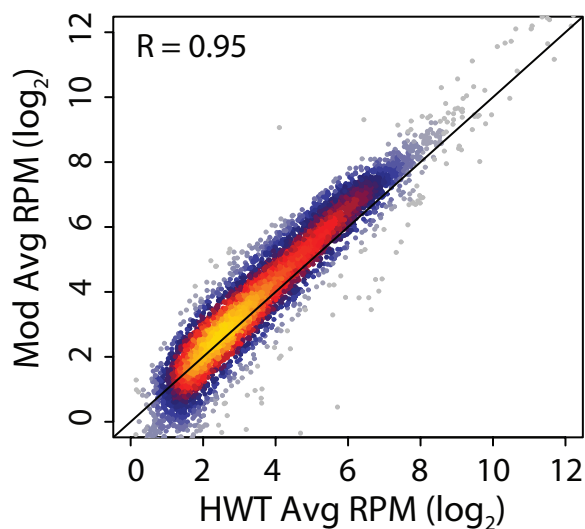**C**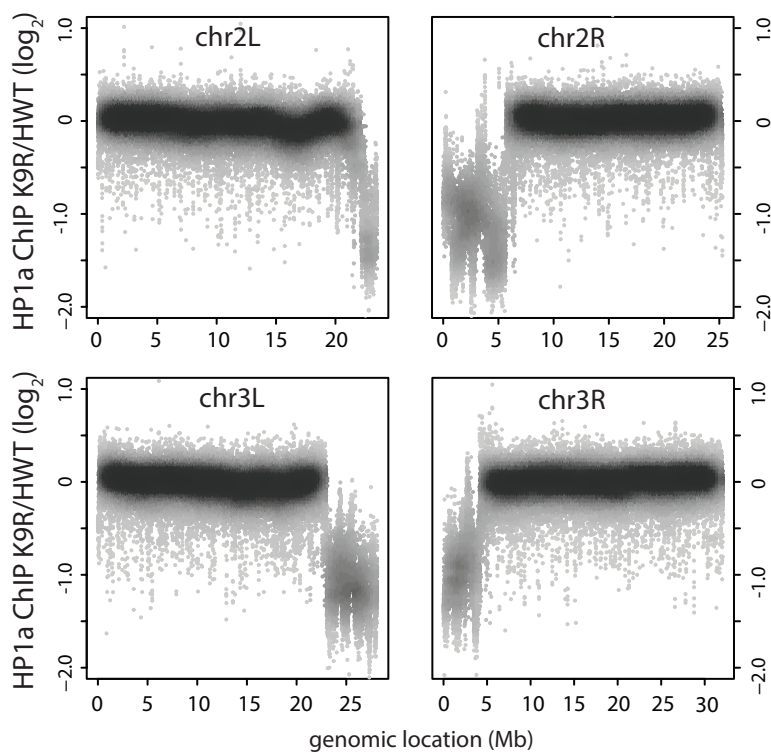**D**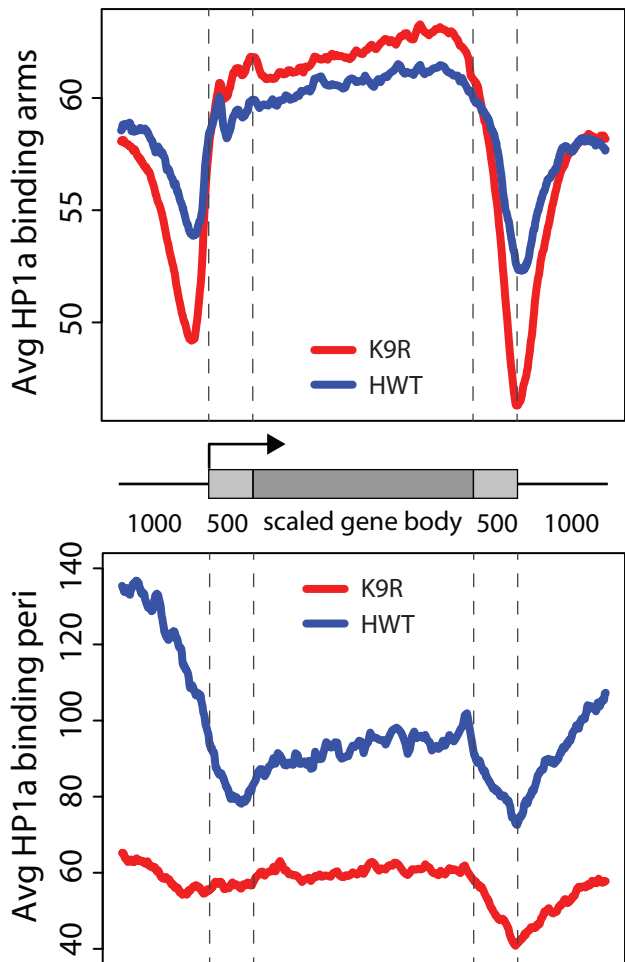**E**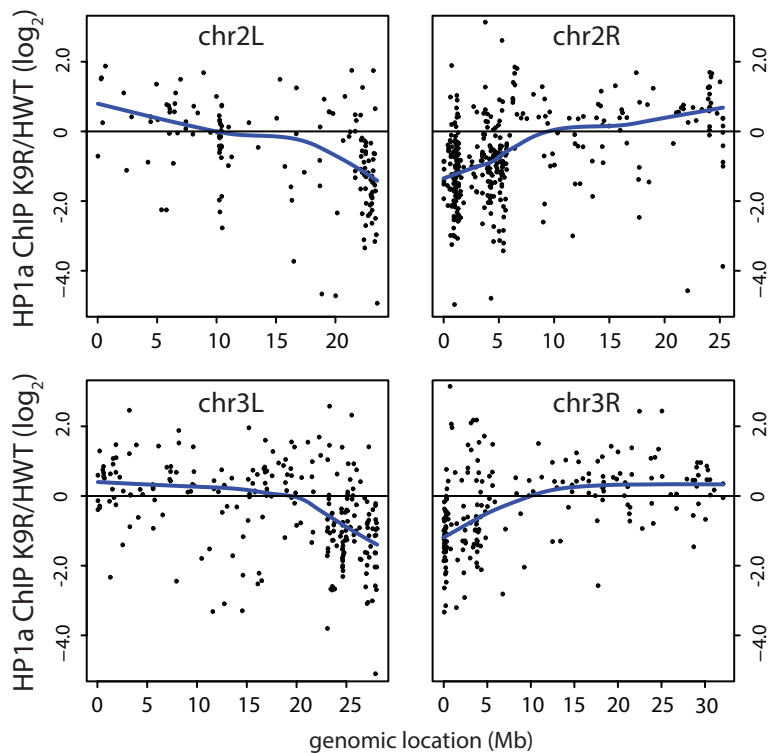

**A**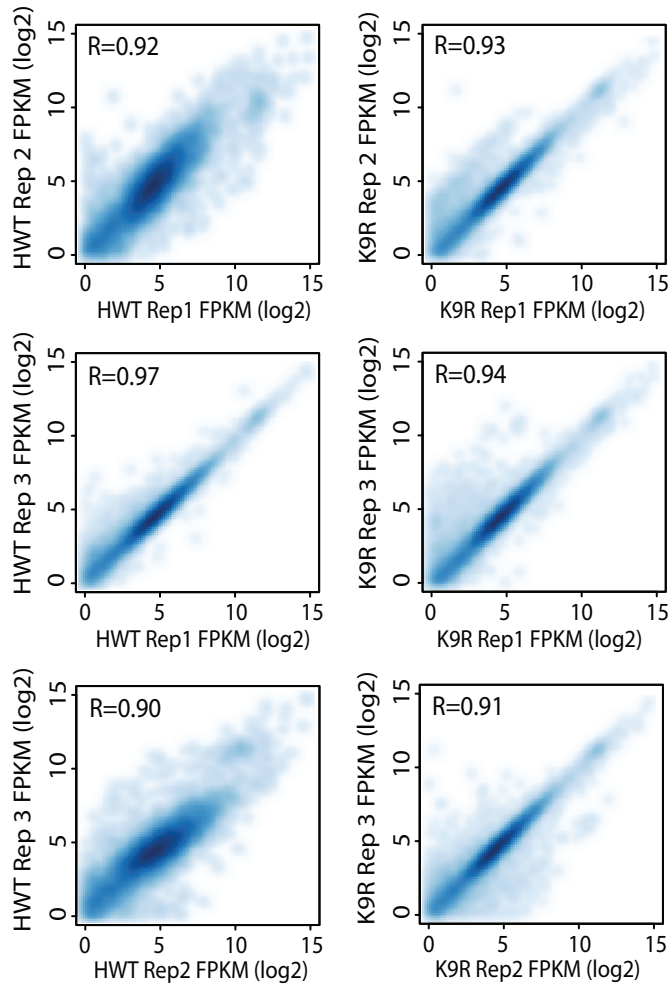**B**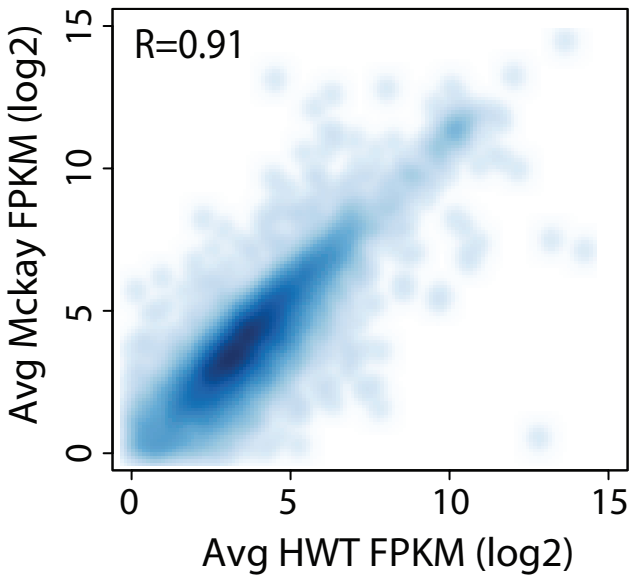**C**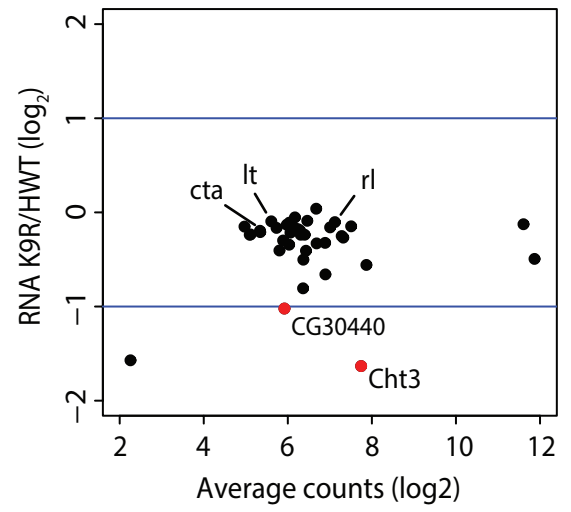**D**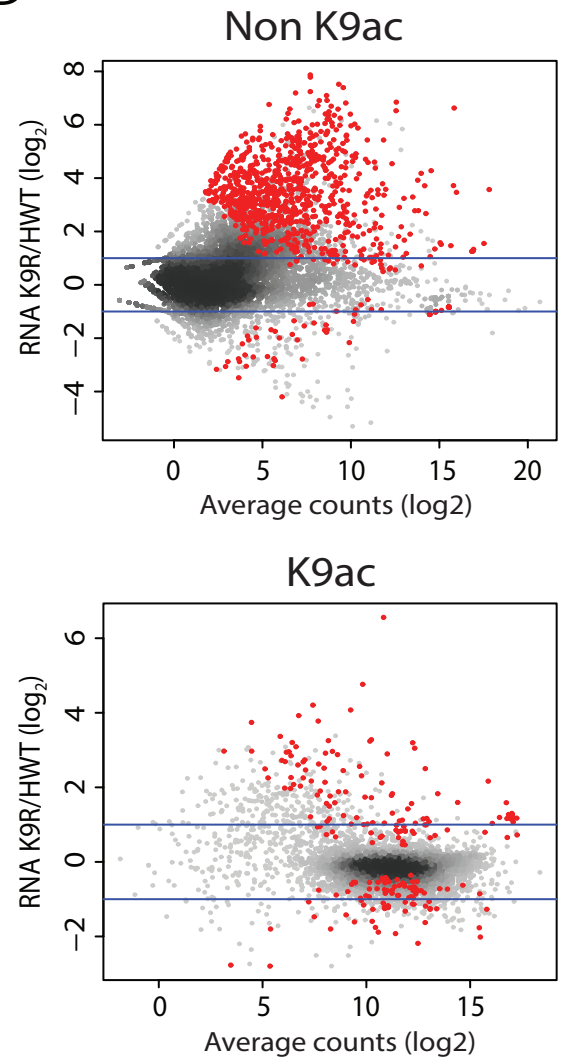

**A**

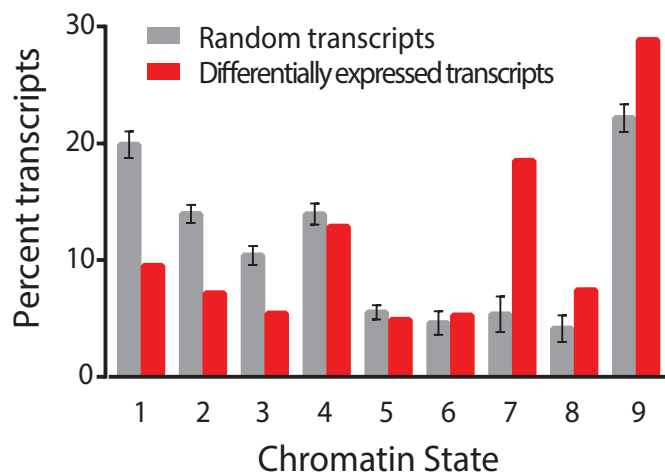

- 1) H3K4me2/3, H3K9ac      4) H3K36me      7) H3K9me2/3
- 2) H3K36me3              5) H4K16ac, H3K36me3      8) Low H3K9me2/3
- 3) H3K18ac, H3K27ac      6) H3K27me2/3      9) H1, SUUR

**B**

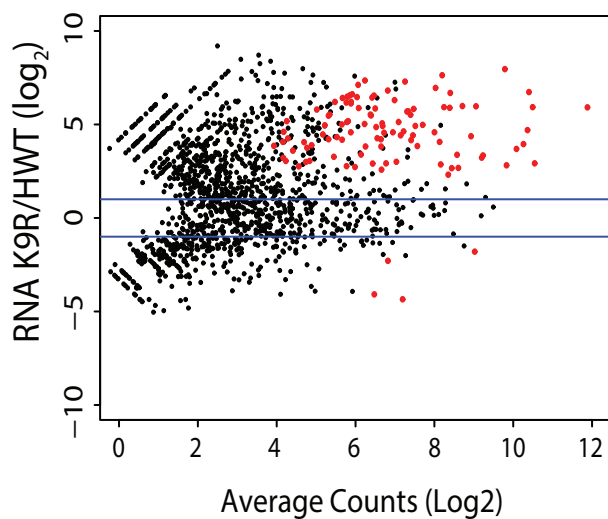

**C**

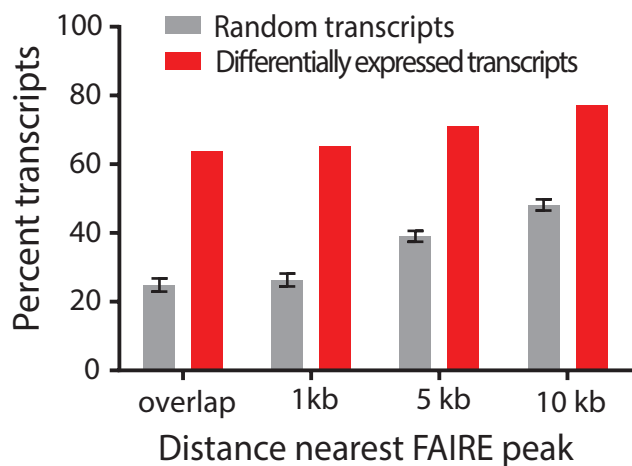

**D**

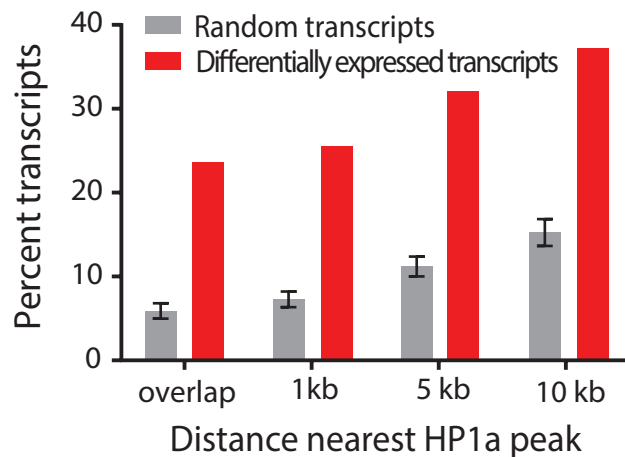

**E**

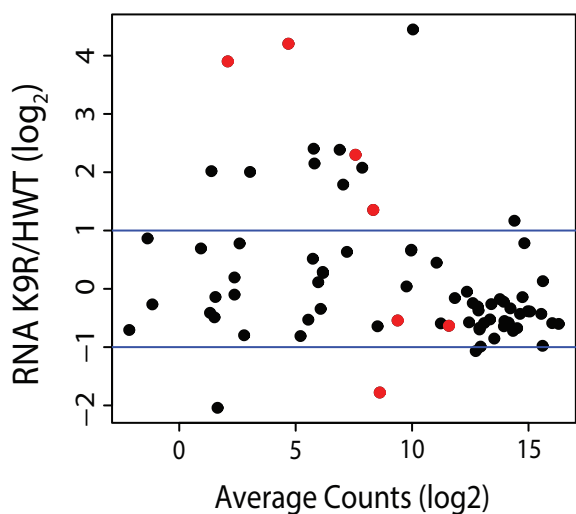

**F**

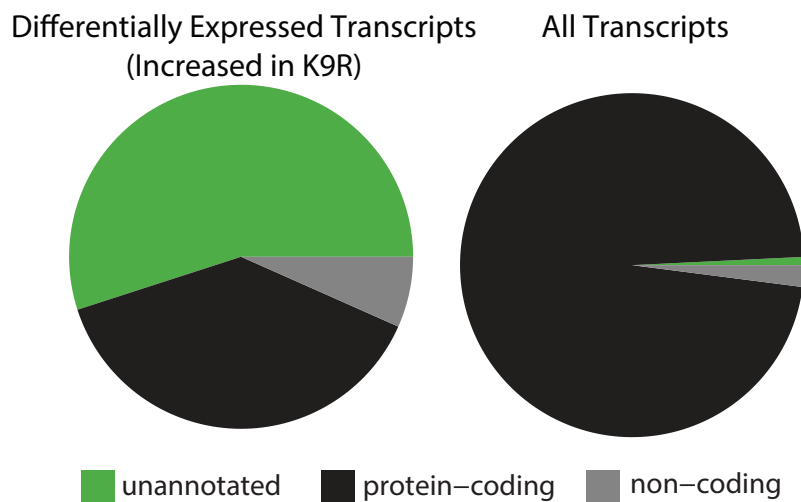

**A**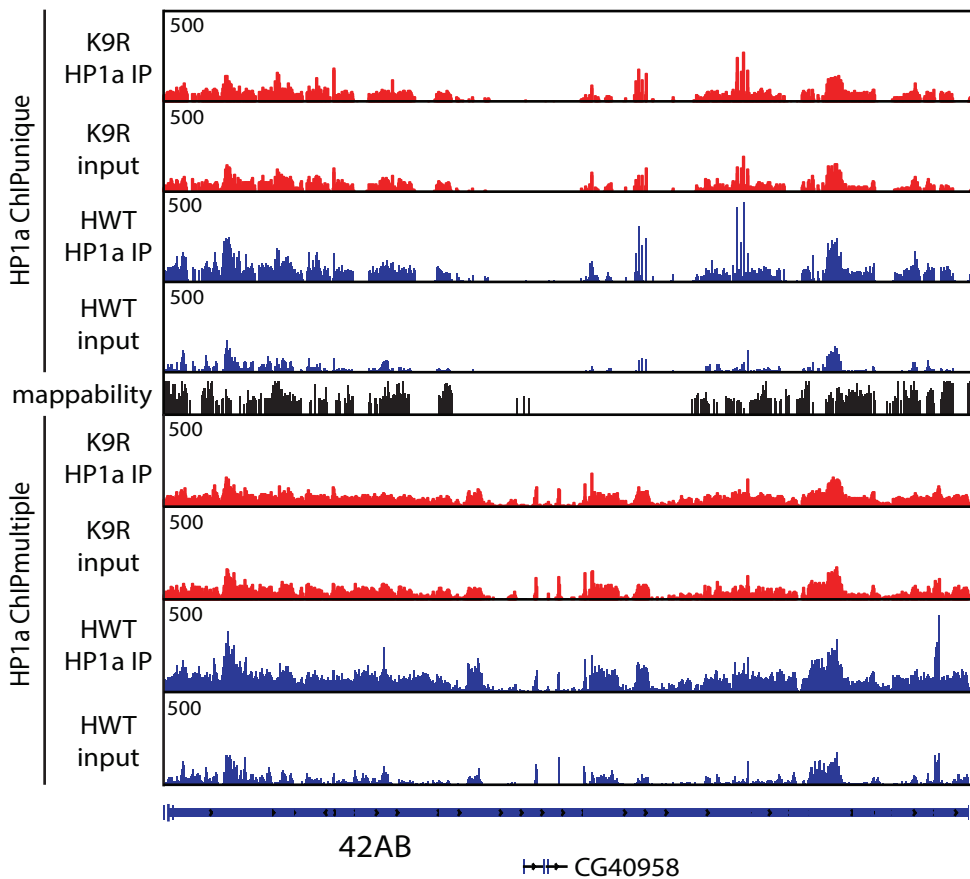**B**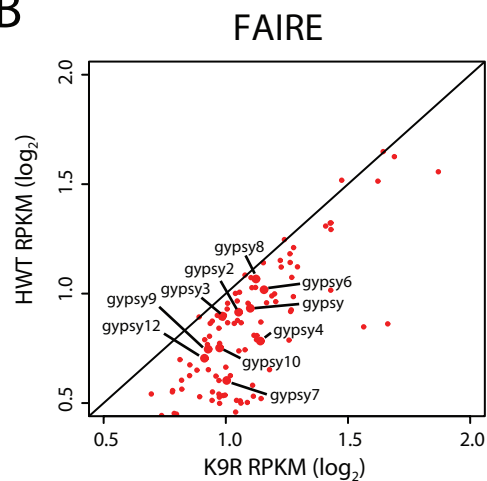**C**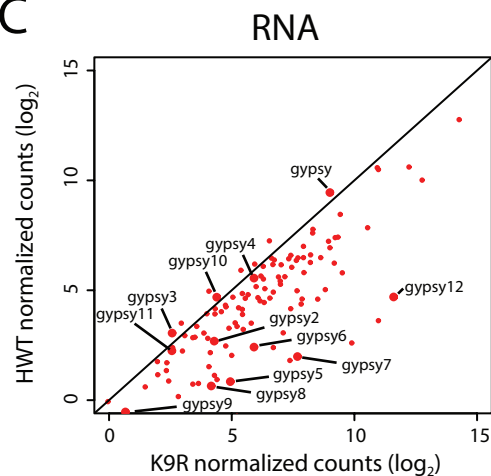**D**

Wing disc 250bp paired end

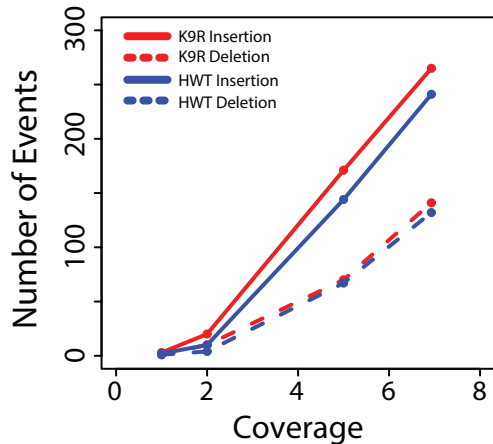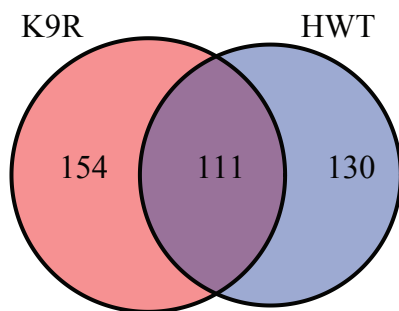

Insertions

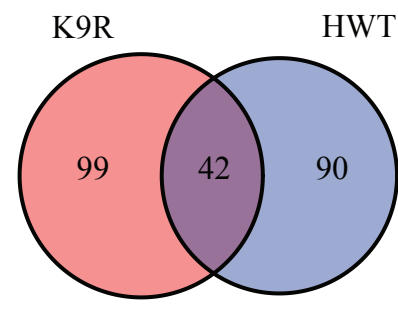

Depletions

**E**

Larvae 100bp single end

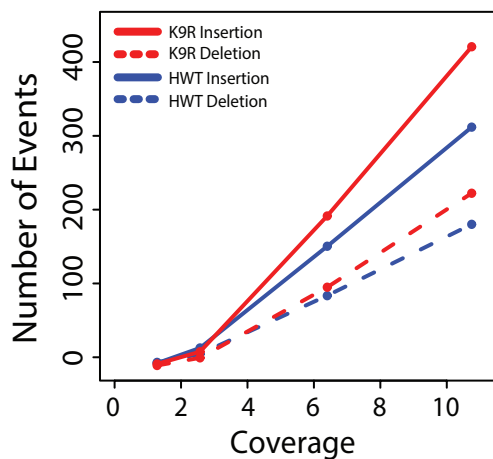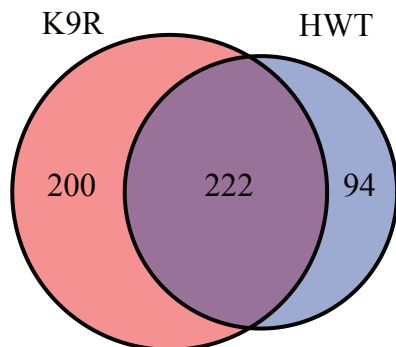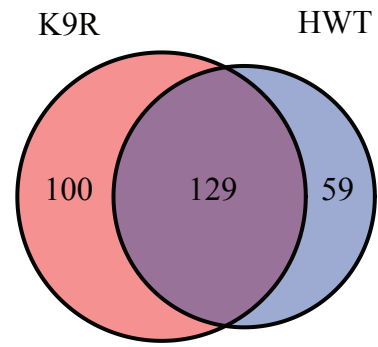

Supplement: supp_gad.286278.116_Supplemental_Figures.pdf [file supp_gad.286278.116_Supplemental_Figures.pdf]
